# Supplementary material
Source: PubMed Central journal article supplement (PMC4074303)
Supplement: supp_jcs.090761_JCS090761TableS1.pdf [file supp_jcs.090761_JCS090761TableS1.pdf]

**Table S1.** Strains and plasmids used in this study

| Strains or plasmids | Genotype                                                                                                                 | Source                                                          |
|---------------------|--------------------------------------------------------------------------------------------------------------------------|-----------------------------------------------------------------|
| GA426               | <i>MATa ade2 trp1 can1 his3-11 ura3-52 DIA V-I</i>                                                                       | (Förstemann <i>et al.</i> , 2000)                               |
| YKF500              | GA426 <i>est2-LT<sup>E76K</sup></i>                                                                                      | (Ji <i>et al.</i> , 2008)                                       |
| YKF511              | GA426 <i>est2-up34</i>                                                                                                   | This study                                                      |
| YKF600              | GA426 <i>rif1::Kan<sup>R</sup></i>                                                                                       | This study                                                      |
| YKF601              | GA426 <i>rif2::Kan<sup>R</sup></i>                                                                                       | This study                                                      |
| YKF602              | GA426 <i>pif1::Kan<sup>R</sup></i>                                                                                       | This study                                                      |
| YKF603              | GA426 <i>pif1-m2</i>                                                                                                     | This study                                                      |
| YKF604              | GA426 <i>elg1::Kan<sup>R</sup></i>                                                                                       | This study                                                      |
| YKF605              | GA426 <i>ssn8::Kan<sup>R</sup></i>                                                                                       | This study                                                      |
| YKJM1 <sup>a</sup>  | <i>MATa ura3-52 leu2-Δ1 trp1-Δ63 his3-Δ200 lys2ΔBgl hom3-10 ade2Δ1 ade8 YEL069::URA3</i>                                 | (Banerjee <i>et al.</i> , 2008)                                 |
| YPH499              | <i>MATa ura3-52 lys2-801 ade2-801 trp1-Δ1 his3-Δ200 leu2-Δ1</i>                                                          | (Schulz and Zakian, 1994)                                       |
| UCC5706             | <i>MATa-inc ura3-52 lys2-801 ade2-101 trp1-Δ63 his3-Δ200 leu2-Δ1::LEU2-GALHO VII-L::ADE2-TG-HO stie-LYS2 rad52::hisG</i> | (Diede and Gottschling, 1999)                                   |
| YKF512              | UCC5706 <i>est2-LT<sup>E76K</sup></i>                                                                                    | This study                                                      |
| YKF606              | GA426 <i>EST2 tlc1::Kan<sup>R</sup> pKF5</i>                                                                             | This study                                                      |
| YKF607              | GA426 <i>EST2 tlc1::Kan<sup>R</sup> pKF10</i>                                                                            | This study                                                      |
| YKF608              | GA426 <i>est2-LT<sup>E76K</sup> tlc1::Kan<sup>R</sup> pKF5</i>                                                           | This study                                                      |
| YKF609              | GA426 <i>est2-LT<sup>E76K</sup> tlc1::Kan<sup>R</sup> pKF10</i>                                                          | This study                                                      |
| YKF610              | GA426 <i>EST2 tlc1::TLC1 tlc1-tm</i>                                                                                     | This study                                                      |
| YKF611              | GA426 <i>est2-LT<sup>E76K</sup> tlc1::TLC1 tlc1-tm</i>                                                                   | This study                                                      |
| pKF5                | <i>CEN TLC1 NcoI (<sup>455</sup>G→A) TRP</i>                                                                             | (Förstemann and Lingner, 2001)                                  |
| pKF10               | <i>CEN TLC1 NcoI (<sup>455</sup>G→A + <sup>484</sup>ACA<sup>482</sup>→CAC) TRP</i>                                       | (Förstemann and Lingner, 2001; Förstemann <i>et al.</i> , 2003) |
| pLIB17              | <i>CEN tlc1-tm ΔNcoI (<sup>455</sup>G→A + <sup>480</sup>ACACCCACAC<sup>471</sup>→CUAAACCACA) TRP</i>                     | (Förstemann <i>et al.</i> , 2003)                               |
| pRS306 tlc1-tm      | <i>INT tlc1-tm URA</i>                                                                                                   | This study                                                      |
| pKF1201             | pET Duet-1 <i>MBP-EST2<sup>1EN</sup></i>                                                                                 | Talley, J and Friedman, K; submitted                            |
| pKF1202             | pET Duet-1 <i>MBP-Est2 E76K<sup>1EN</sup></i>                                                                            | This study                                                      |
| pKF1203             | pET Duet-1 <i>MBP-Est2 R151A<sup>1EN</sup></i>                                                                           | This study                                                      |

<sup>a</sup> Previously published as RDKY3615
