# Supplementary material
Source: PubMed Central journal article supplement (PMC4074303)
Supplement: supp_jcs.090761_JCS090761TableS2.pdf [file supp_jcs.090761_JCS090761TableS2.pdf]

**Table S2.** Primers used in this study

| Name                         | Primer sequence                                                               |
|------------------------------|-------------------------------------------------------------------------------|
| <i>RIF1::Kan<sup>R</sup></i> | CGTCAACGTTATTACAGGAT<br>CGATTTCTAGTGTGTCATCG                                  |
| <i>RIF2::Kan<sup>R</sup></i> | CGCTTACAGATATGTACAGA<br>AATAGAGACAAGCCAGGTGG                                  |
| <i>PIF1::Kan<sup>R</sup></i> | GTAGTTTTTGTGATGCTGTTTCAG<br>GTGAGTTAGTCTCCTTTGGC                              |
| <i>ELG1::Kan<sup>R</sup></i> | GACGCCAAACGCGTAACGTTAGCGGTG<br>CGCTGTTTTGAAATATGCACTATGAGG                    |
| <i>SSN8::Kan<sup>R</sup></i> | GAAAATTAGGGTTCATACAGGAGTAG<br>GCATTATAACGGTACCTATTCTCAATATG                   |
| <i>TLC1::Kan<sup>R</sup></i> | GATGTAACAAGCATATGCAATTATTTGGTTTCCC<br>GGTGGCATCTATAAGAGCTCTATCTGGCTGCTAAGC    |
| est2-E76K                    | CCTGTTGACGGGCAAGCTTTACAACAACGTAC<br>GTACGTTGTTGTAAAGCTTGCCCGTCAACAGG          |
| est2-R151A                   | CTCAAATCGTGGGTAATGCATGTAACGAACCTCATC<br>GATGAGGTTTCGTTACATGCATTACCCACGATTTGAG |
| pET Duet<br>MBP              | GGTTATGCGTTCAAGTATGAAAACGGCAAGTACG<br>CGGTGAGCGTGGGTCTCGCGGTATCATTGCAGCAC     |
| ds oligo 1                   | GGGTTCGAATGACCGGCAGCAGCAAAATG                                                 |
| ds oligo 2                   | CATTTTGCTGCTGCCGGTCATTCGAACCC                                                 |
| DIA5-1                       | GTGAGCGGATAACAATTTACACAGTCTAGATGTCCGAATT<br>GATCCCAGAGTAG                     |
| XV-L                         | GTGAGTACCAGATGATGGAT                                                          |
| Inv 5' ADE2                  | CAAGATATCAAAACTGTAAAT                                                         |
| Bio-TG28*                    | B - TGTGGTGTGGGTGTGGTGTGTGGGTGTG                                              |
| Bio-TG16*                    | B - GTGTGTGGTGTGTGGG                                                          |
| Bio-AC16*                    | B - CACACACCACACACCC                                                          |
| Bio-<br>Random*              | B - GGAAGGCCGATCGGTGCAGCCTCTTCGCTA                                            |

All primers sequences are written 5' to 3'. \* B refers to the 5' biotinylation.
